# Supplementary material
Source: Springer Nature journal article supplement (https://www.springermedizin.de/resource/supplementary/12902_2014_312_MOESM9_ESM.pdf/9515938)

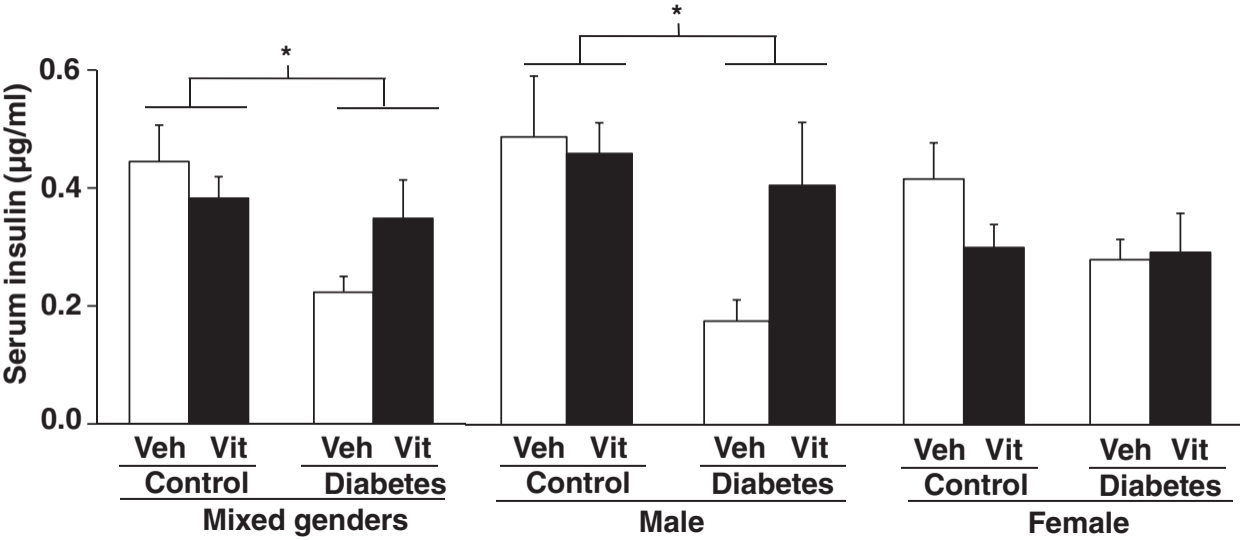

Supplement: MOESM9 [file 9515938]
